# Supplementary material for: Non-crystal-RuOx/crystalline-ZnO composites: controllable synthesis and high-performance toxic gas sensors
Source: Royal Society of Chemistry journal article supplement (doi:10.1039/d2ta02856e), 2022-01-01
Supplement: d2ta02856e1.pdf [file d2ta02856e1.pdf]

## Electronic Supporting Information

**Non-crystal-RuO<sub>x</sub>/crystalline-ZnO composites: controllable synthesis and high-performance toxic gas sensor**

*Na Luo, Haijie Cai, Xiaojie Li, Mengmeng Guo, Chen Wang, Pengfei Hu, Xiaohong Wang, Zhixuan Cheng, Jiaqiang Xu\**

NEST Lab, Department of Physics, Department of Chemistry, College of Sciences,  
Shanghai University, Shanghai 200444, China.

E-mail: xujiaqiang@shu.edu.cn (J. Xu)

## Characterization

Crystal structure of the products was characterized by X-ray diffraction analysis (XRD, Rigaku Corp., D/max2500) by using Cu K $\alpha$ 1 radiation (40 mA, 40 kV, 6°/min from 20 to 80°). The morphologies of the samples were observed by a field emission scanning electron microscopy (FESEM, JSM-6700F). The morphologies of all the samples were observed by Transmission electron microscopy (TEM, JEOL Ltd., JEM-2100F) equipped with an energy dispersive X-ray spectroscopy (EDS). The chemical states of the surface elements were measured by X-ray photoelectron spectroscopy (XPS) (Thermo fisher scientific Ltd, ESCALAB 250Xi) by using an Al K $\alpha$  monochromated (150 W, 20 eV pass energy, 500  $\mu$ m spot size). The C 1s signal at 284.6 eV was used to calibrate the binding energy scale. The Raman spectra were obtained on a Renishaw spectrometer (Raman, INVIA). The composition of the Li and Ru was measured by the inductively coupled plasma atomic emission spectroscopy (ICP-AES, Agilent 725) and energy dispersive spectrometer (EDS). The redox performance of the materials were measured by H<sub>2</sub> temperature program reduction (H<sub>2</sub>-TPR, AutoChem II 2920).

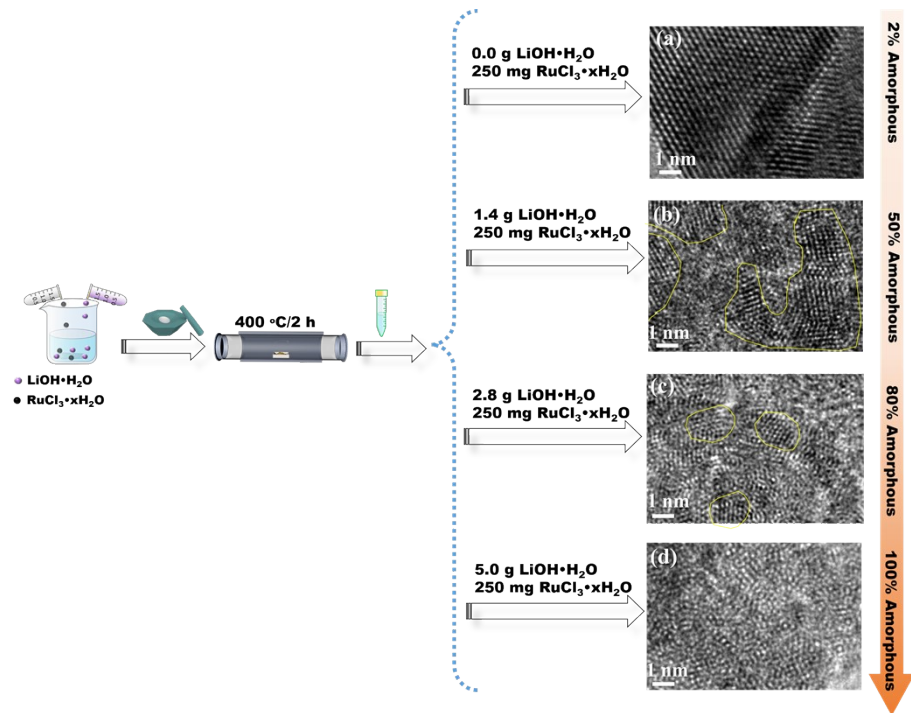

**Fig. S1.** Schematic illustration of the synthesis of  $\text{RuO}_x$ .

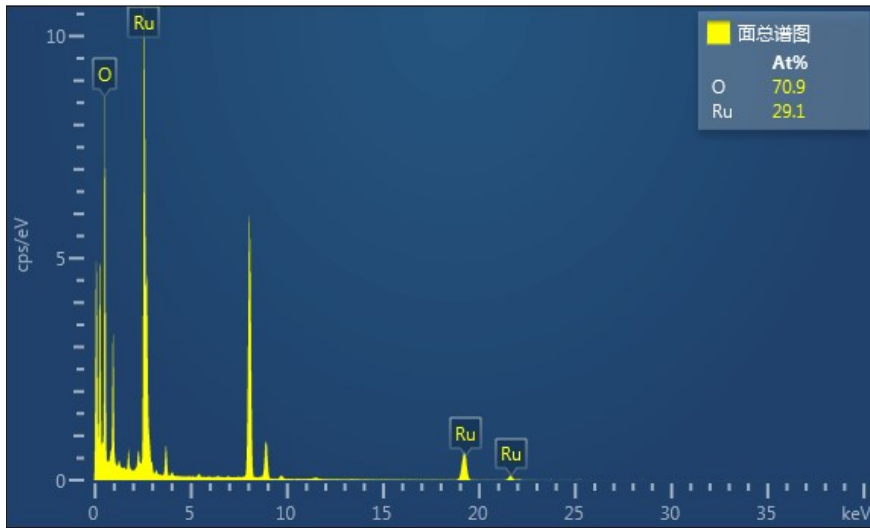

**Fig. S2.** The EDS pattern of the RuO<sub>x</sub>.

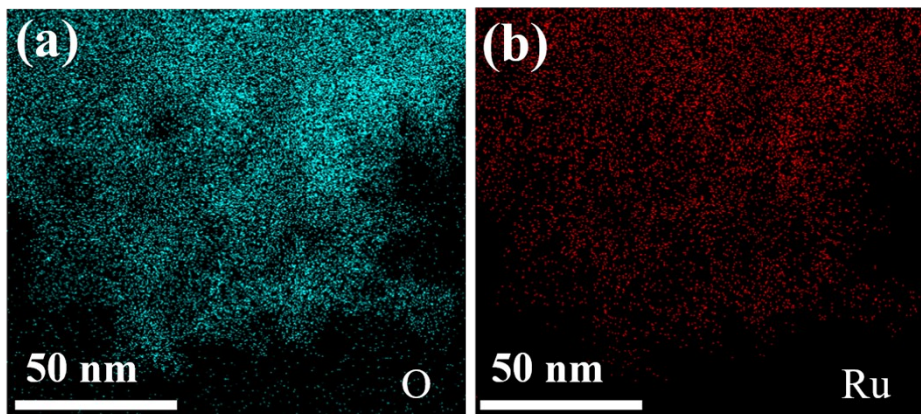

**Fig. S3.** EDS element mappings of O and Ru elements in the  $\text{RuO}_x$ .

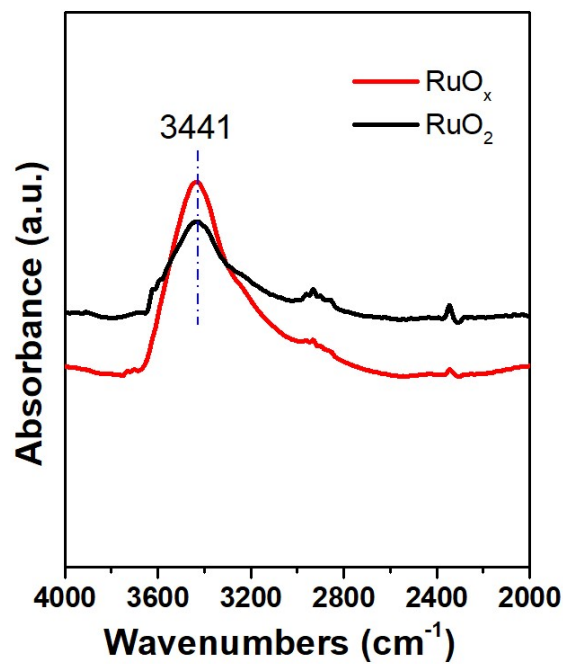

**Fig. S4.** FTIR images of the RuO<sub>2</sub> and RuO<sub>x</sub>.

The FTIR spectra of the synthesized RuO<sub>2</sub> and RuO<sub>x</sub> are presented in Fig. S4. A broad band between 3000 and 3700 cm<sup>-1</sup> is attributed to the stretching mode of hydrogen-bonded hydroxyl groups. Peak intensity of the FTIR adsorption ascribed to hydroxyl groups for the RuO<sub>x</sub> is higher than that of the RuO<sub>2</sub>, indicating that the RuO<sub>x</sub> has the more surface hydroxyl groups than the RuO<sub>2</sub>.

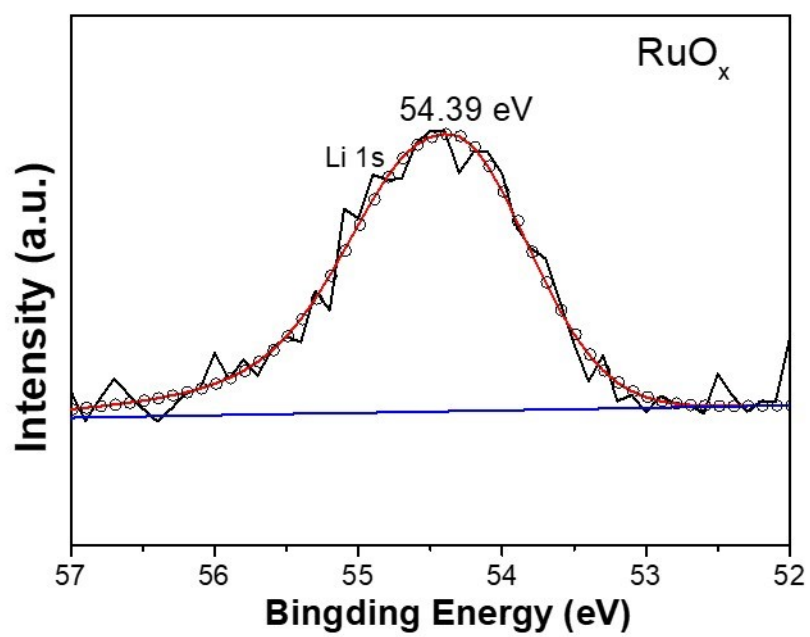

Fig. S5. High resolution XPS spectra for Li 1s of the RuO<sub>x</sub>.

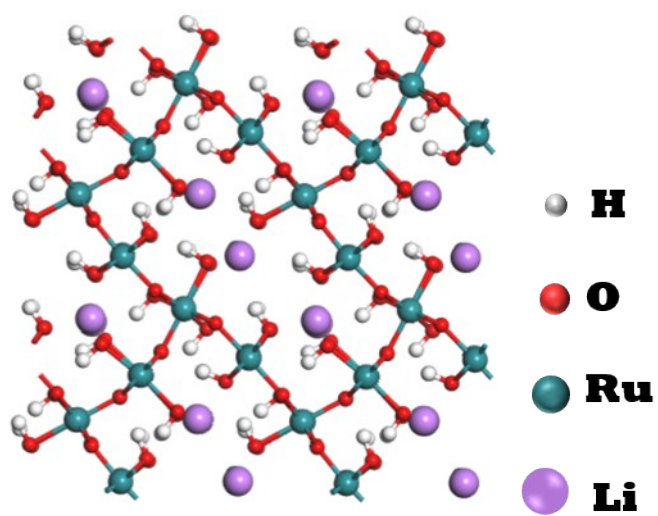

Fig. S6. The cell structure of the RuO<sub>x</sub>.



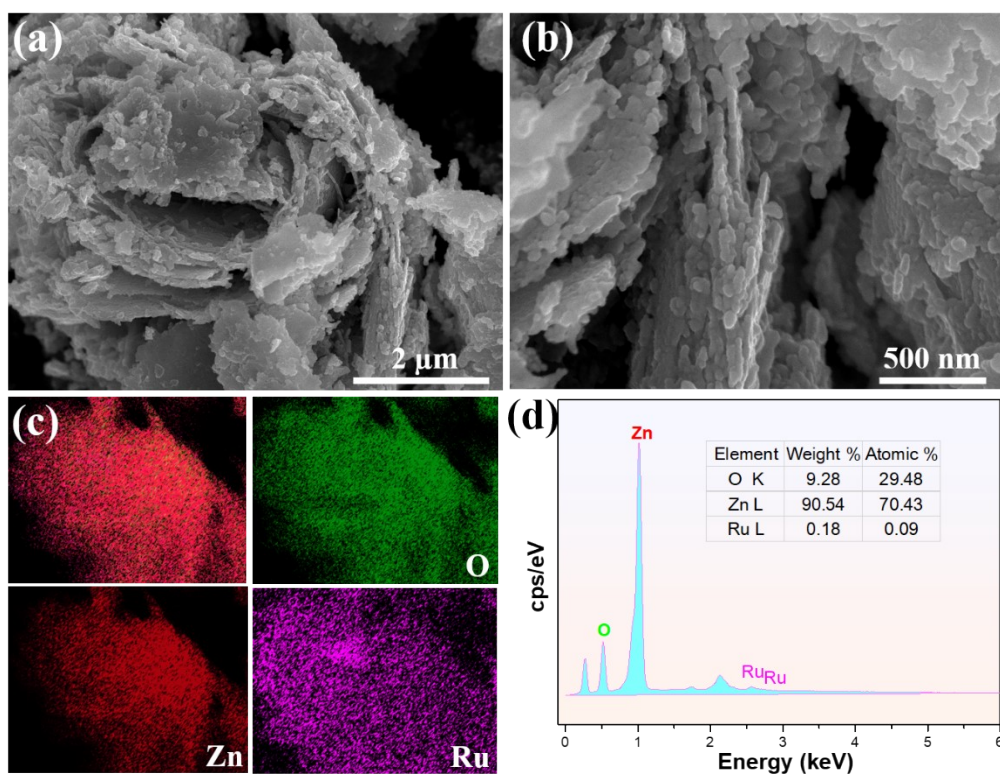

**Fig. S7.** (a,b) Typical FESEM images of ZnO/RuO<sub>x</sub> with different magnification; (c) EDS element mappings of O, Zn and Ru; (d) the EDS patterns of ZnO/RuO<sub>x</sub>.

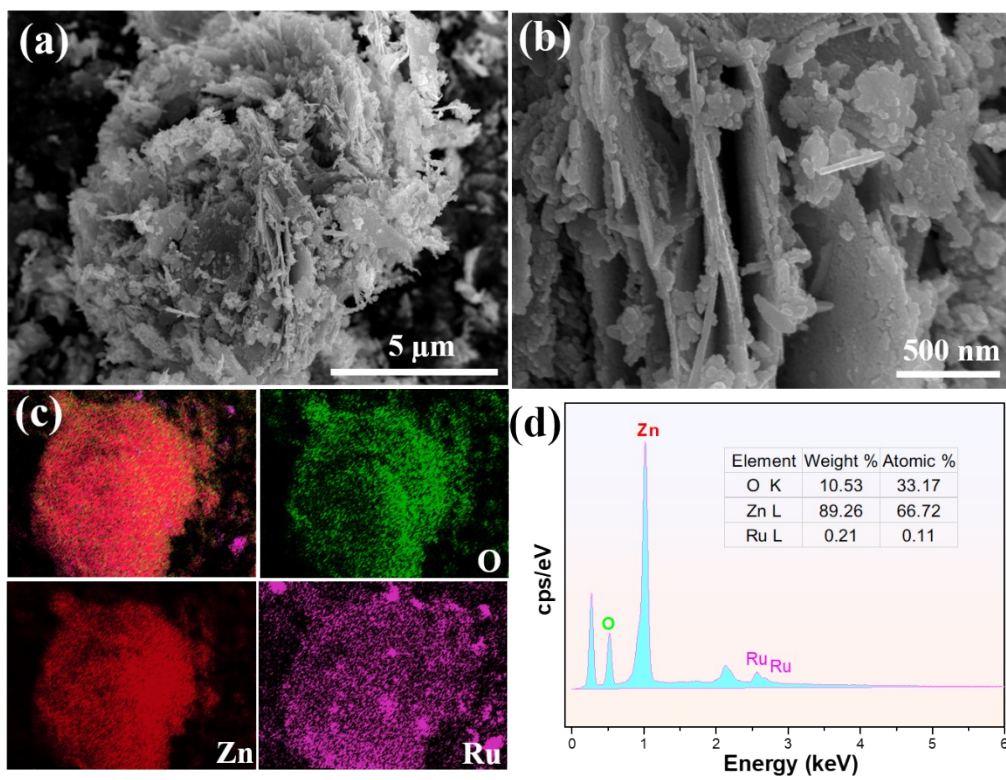

**Fig. S8.** (a,b) Typical FESEM images of ZnO/RuO<sub>2</sub> with different magnification; (c) EDS element mappings of O, Zn and Ru; (d) the EDS patterns of ZnO/RuO<sub>2</sub>.

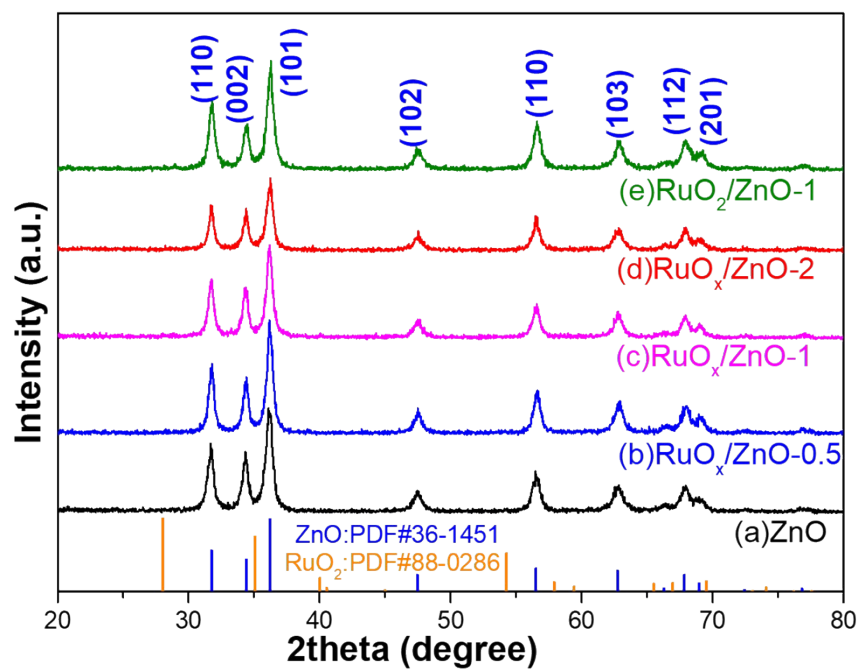

**Fig. S9.** XRD spectra for ZnO, RuO<sub>x</sub>/ZnO-0.5, RuO<sub>x</sub>/ZnO-1, RuO<sub>x</sub>/ZnO-2 and RuO<sub>2</sub>/ZnO-1.

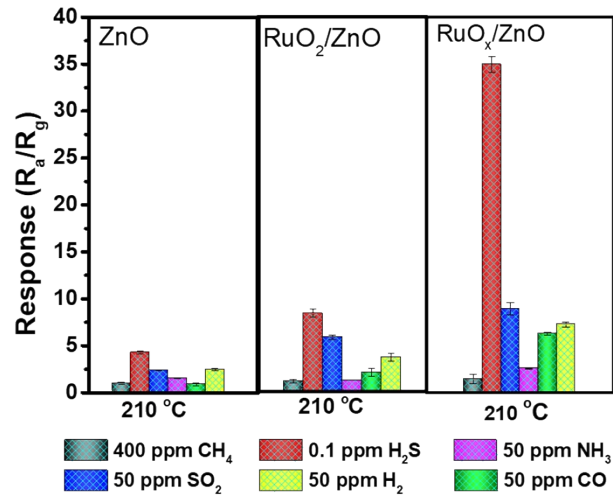

**Fig. S10.** The response of ZnO, RuO<sub>2</sub>/ZnO and RuO<sub>x</sub>/ZnO based sensors to various gas.

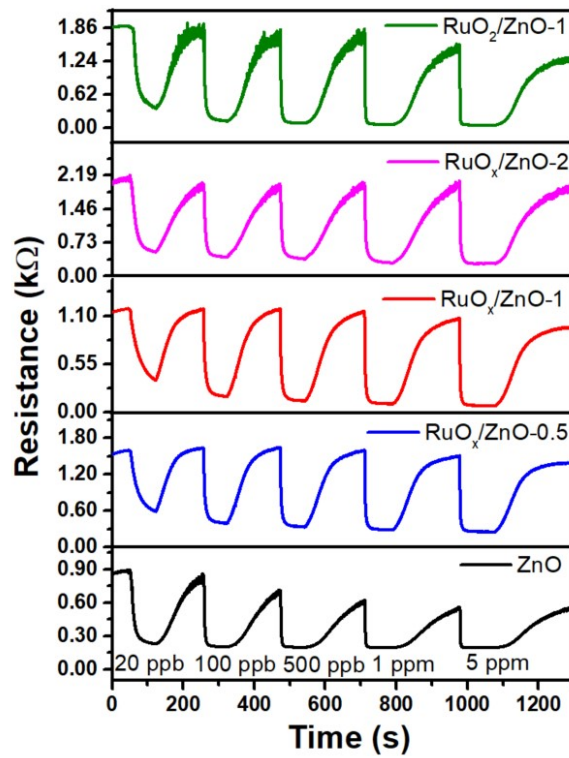

**Fig. S11.** Transient sensor resistance changes of the ZnO,  $RuO_x/ZnO-n$  ( $n = 0.5, 1, 2$ ) and  $RuO_2/ZnO-1$  sensors towards different concentrations (20 ppb-5 ppm) of  $H_2S$  at 210 °C.

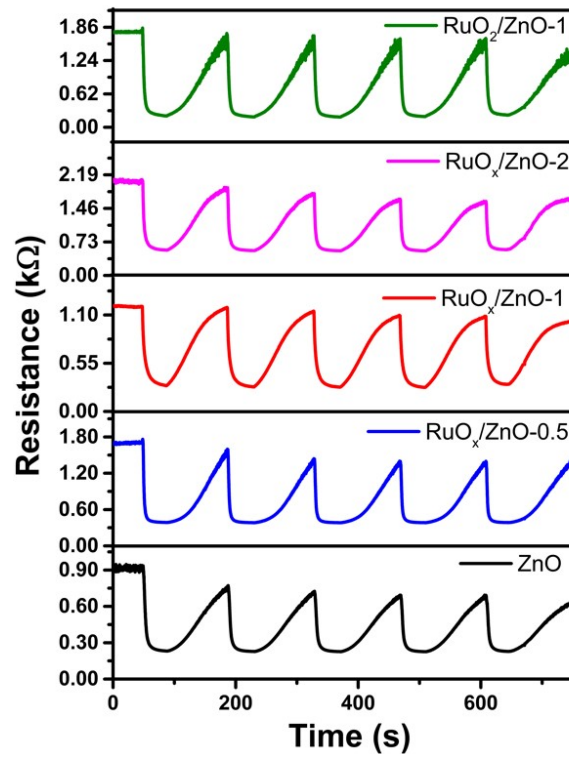

**Fig. S12.** Repeatability measurements of the ZnO,  $RuO_x/ZnO-n$  ( $n = 0.5, 1, 2$ ) and  $RuO_2/ZnO-1$  sensors towards 100 ppb  $H_2S$  at 210 °C.

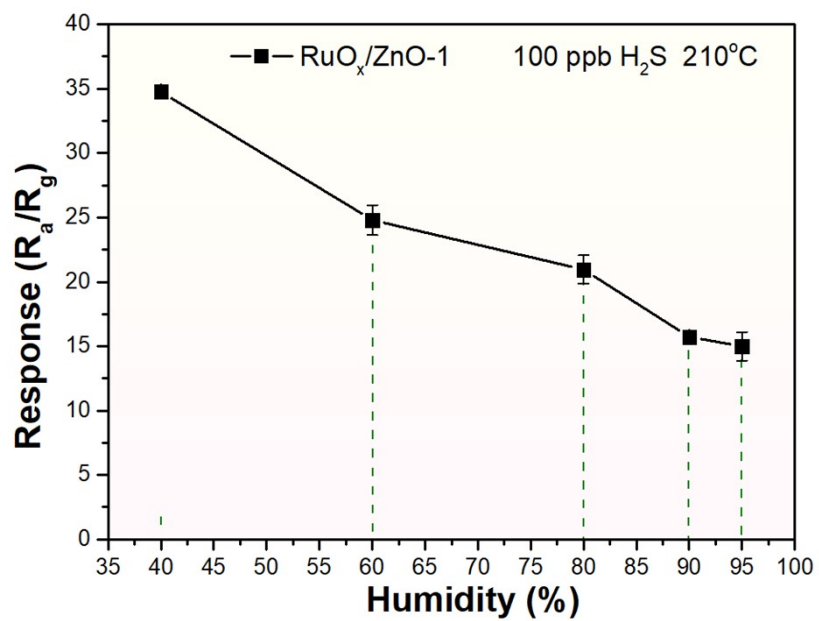

**Fig. S13.** The response of the RuO<sub>x</sub>/ZnO-1 sensor under different humidity conditions.

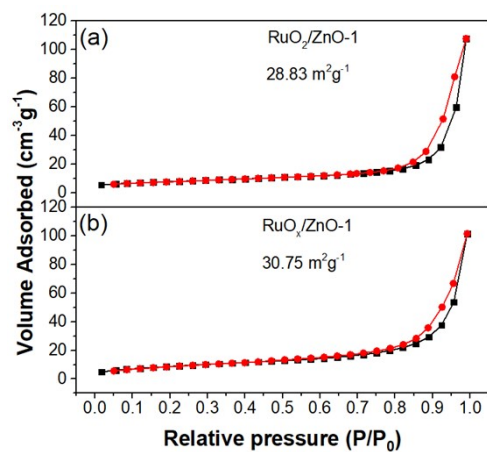

**Fig. S14.** N<sub>2</sub> adsorption-desorption isotherms of the RuO<sub>2</sub>/ZnO-1 and RuO<sub>x</sub>/ZnO-1.



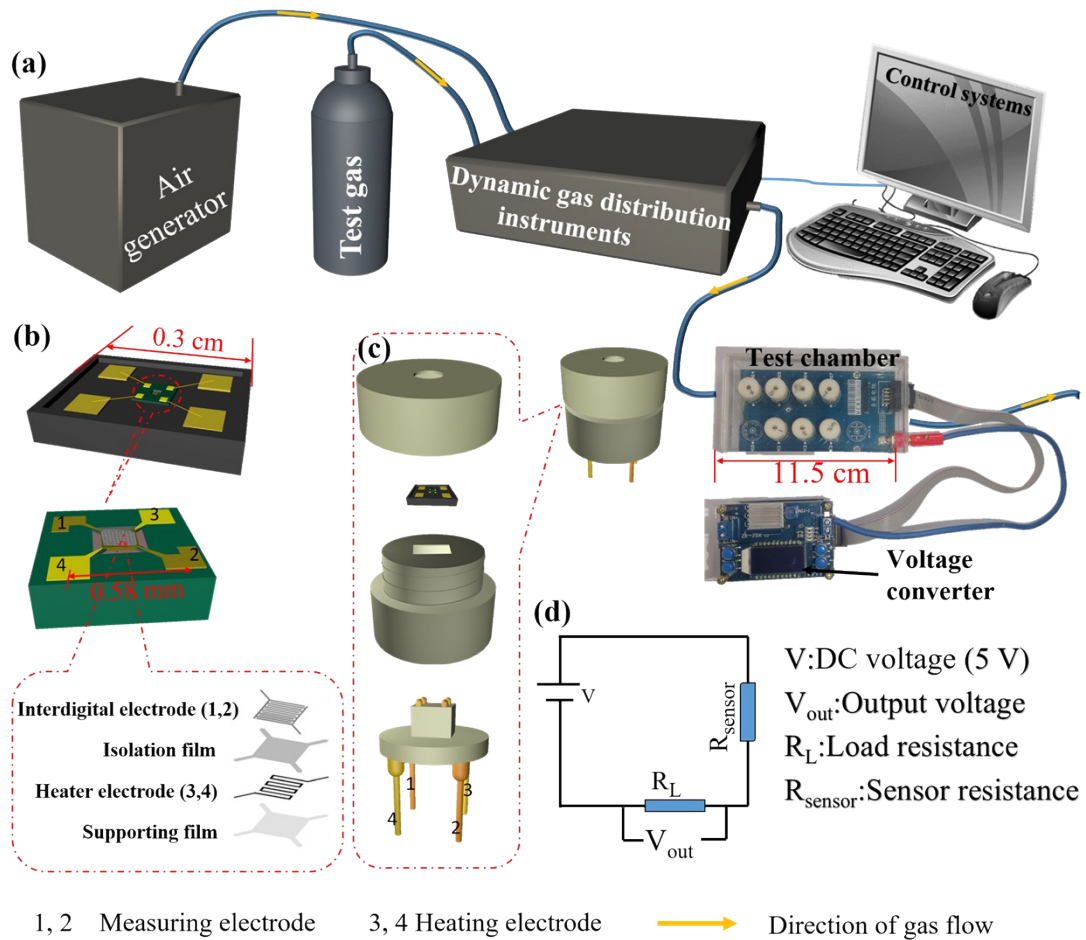

**Fig. S15.** (a) The test system of the MEMS gas sensor; (b) MEMS and exploded view of chip center area; (c) the exploded views of test base; (d) Measuring circuit of MEMS gas sensor.

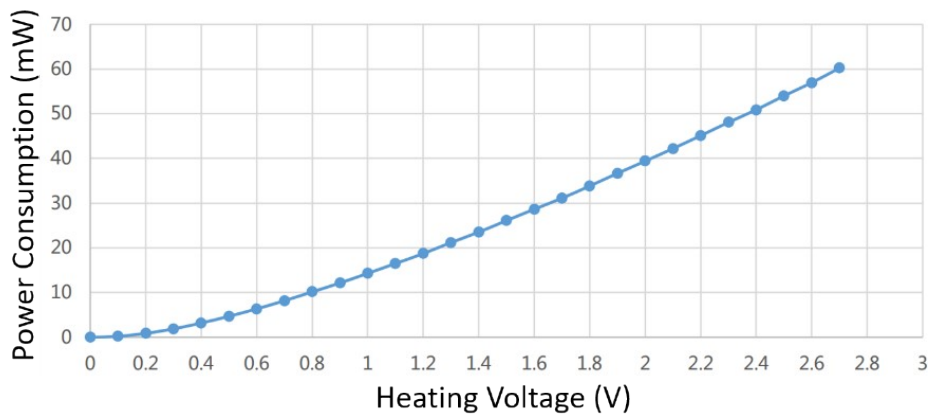

**Fig. R16.** The relations between the power consumption and heating voltage.

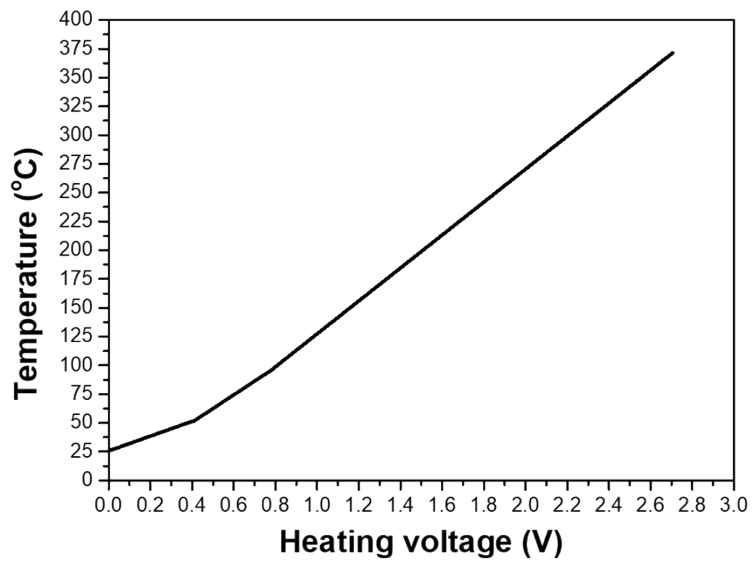

**Fig. S17.** The relationship between the heating voltage and the working temperature.

**Table. S1** ICP-MS results of the RuO<sub>x</sub>.

| Sampling mass/g | Volume /ml | Dilution factor | Test element | Instrument reading | Unit | Conversion content | Unit  | Mass fraction/% |
|-----------------|------------|-----------------|--------------|--------------------|------|--------------------|-------|-----------------|
| 0.0378          | 100        | 1               | Li           | 2.614              | mg/L | 6915.34            | mg/kg | 0.691           |
| 0.0378          | 100        | 10              | Ru           | 10.58              | mg/L | 279894.18          | mg/kg | 27.99           |

**Table S2.** Response ( $T_{res}$ ) and recover ( $T_{rec}$ ) time of the RuO<sub>x</sub>/ZnO-1 sensor to different concentrations of H<sub>2</sub>S at 210°C.

|                        |       |     |     |    |    |
|------------------------|-------|-----|-----|----|----|
| H <sub>2</sub> S (ppm) | 0.020 | 0.1 | 0.5 | 1  | 5  |
| $T_{res}$ (s)          | 11    | 8   | 8   | 7  | 6  |
| $T_{rec}$ (s)          | 42    | 40  | 40  | 38 | 37 |

**Table S3.** Comparison between the H<sub>2</sub>S sensor in this work and reported work.

| Materials                          | Concentration (ppm) | Response | Temperature (°C) | Response and recovery times |                      | Limit of detection (ppb) | reference |
|------------------------------------|---------------------|----------|------------------|-----------------------------|----------------------|--------------------------|-----------|
|                                    |                     |          |                  | t <sub>Res</sub> (s)        | t <sub>Rec</sub> (s) |                          |           |
| ZnO                                | 0.1                 | 4.27     | 210              | 12                          | 50                   | 20                       | This work |
| RuO <sub>2</sub> /ZnO-1            | 0.1                 | 13.42    | 210              | 10                          | 45                   | 20                       |           |
| RuO <sub>2</sub> /ZnO-1            | 0.1                 | 35       | 210              | 8                           | 40                   | 20                       |           |
| ZnO                                | 100                 | 15.92    | 150              | 65                          | 2                    | 1000                     | S1        |
| Pd-loaded SnO <sub>2</sub>         | 20                  | ~21      | 200              | ~30                         | ~170                 | 10                       | S2        |
| ZnO-rGO                            | 20                  | 3.7      | RT               | 404                         | 275                  | 8                        | S3        |
| Net-like SnO <sub>2</sub> /ZnO     | 5                   | 112      | 100              | -                           | 513                  | 10                       | S4        |
| ZnO-CuO                            | 10                  | 72       | 115              | ~150                        | 55                   | 200                      | S5        |
| Au/ZnO                             | 3                   | 475      | 25               | 11 min                      | 20 min               | 0.5                      | S6        |
| Mo-doped ZnO                       | 5                   | 14.11    | 300              | ~40                         | ~50                  | 250                      | S7        |
| α-MoO <sub>3</sub> /ZnO            | 0.5                 | 4        | 270              | 13                          | 29                   | 500                      | S8        |
| Pt /WO <sub>3</sub>                | 5                   | 372      | 365              | -                           | -                    | 0.4                      | S9        |
| Pt /SnO <sub>2</sub>               | 1                   | 70       | 30               | 280                         | 510                  | 100                      | S10       |
| Pt/SnO <sub>2</sub>                | 1                   | 10.8     | 250              | 192.4                       | 76.5                 | 1000                     | S11       |
| MoO <sub>3</sub> /SnO <sub>2</sub> | 10                  | 43.5     | 115              | 22                          | 10                   | 100                      | S12       |
| Au/ZnO/SnO <sub>2</sub>            | 1                   | 73.3     | 350              | 36                          | 786                  | 100                      | S13       |

## References:

- S1. S. Zhang, Z. Liu, L. Zhang, J. Chen, Q. Zhou, H. Zhang, L. Nie, Z. Dong, Z. Zhang, Z. Wang and G. Pan, *Chem. Phys. Lett.*, 2021, **763**, 138188.
- S2. Y. Su, P. Chen, P. Wang, J. Ge, S. Hu, Y. Zhao, G. Xie, W. Liang and P. Song, *RSC Adv.* 2019, **9**, 5987-5994.
- S3. A. D. Ugale, G. G. Umarji, S. H. Jung, N. G. Deshpande, W. Lee, H. K. Cho and J. B. Yoo, *Sens. Actuators B-Chem*, 2020, **308**, 127690.
- S4. D. Fu, C. Zhu, X. Zhang, C. Li and Y. Chen, *J. Mater. Chem. A*, 2016, **4**, 1390-1398.
- S5. Z. Cao, L. Gao, J. Mi, Y. Yuan, Q. Yang, Y. Luo, J. Shi and G. Duan, *ACS Appl. Nano Mater.* 2022, **5**, 2126-2136.
- S6. Z. S. Hosseini, A. Mortezaali, A. Irajizad and S. Fardindoost, *J. Alloys Compd.* 2015, **628**, 222-229.
- S7. H.-S. Woo, C.-H. Kwak, I.-D. Kim and J.-H. Lee, *J. Mater. Chem. A*, 2014, **2**, 6412-6418.
- S8. H.-L. Yu, L. Li, X.-M. Gao, Y. Zhang, F. Meng, T.-S. Wang, G. Xiao, Y.-J. Chen and C.-L. Zhu, *Sens. Actuators B-Chem*, 2012, **171-172**, 679-685.
- S9. M.-H. Kim, J.-S. Jang, W.-T. Koo, S.-J. Choi, S.-J. Kim, D.-H. Kim and I.-D. Kim, *ACS Appl. Mater. Interfaces*, 2018, **10**, 20643-20651.
- S10. Y.-P. Sun, Y.-F. Zhao, H. Sun, F.-C. Jia, P. Kumar and B. Liu, *J. Alloys Compd.* 2020, **842**, 155813.
- S11. P. M. Bulemo, H. J. Cho, D. H. Kim and I. D. Kim, *ACS Appl. Mater. Interfaces*, 2018, **10**, 18183-18191.
- S12. X. Gao, Q. Ouyang, C. Zhu, X. Zhang and Y. Chen, *ACS Appl. Nano Mater.* 2019, **2**, 2418-2425.
- S13. C. M. Hung, H. V. Phuong, V. Van Thinh, L. T. Hong, N. T. Thang, N. H. Hanh, N. Q. Dich, N. Van Duy, N. Van Hieu and N. D. Hoa, *Sens. Actuators, A* 2021, **317**, 112454.
